# Supplementary material
Source: PubMed Central journal article supplement (PMC7540105)
Supplement: ajtr0012-5064-f10.pdf [file ajtr0012-5064-f10.pdf]

## The pathological role of PDA

**Supplementary Table 1.** Primers used for RT-qPCR analyses to examine gene expression levels

| Gene    | Forward Primers (5'→3') | Reverse primers (5'→3')  |
|---------|-------------------------|--------------------------|
| FOXM1   | TGTGCTCAAGCTGTCCACCATCC | ACACAAGGTCCCAGCAGTGGC    |
| PUMA    | GACTTTCTCTGCACCATGTAGCA | GTCCCTCTCCTGGCTTCTTGCCAG |
| APAF1   | TCACAGCACCATCCAGTACTG   | CCCAACTTAAATGTCCTCTGCAAT |
| KAT5    | TGTTTGGGCACTGATGAGGACT  | CTCAATGCACTCAATGTTCTTCA  |
| MSH6    | GATTAGACAGTGTCCAGCACC   | ATCAGGGACATGATGTAGAG     |
| BCL2    | CCAGAGACATCAGCATGGCTC   | GATGTCCCTACCAACCAGAAG    |
| BIRC5   | GTCTGTCAGCCCAACCTTAC    | ACCCTGCAGCTCTATGACAG     |
| NPM1    | GGAAGATGCAGAGTCAGAAGA   | TCCTTTCATCATCATCGTCA     |
| NOD1    | GCAGATGCGTTACAGAGCAACA  | GAAACAGATAATCCGCTTCTC    |
| FAS     | GGCAAGACTGCCCTTAGAAT    | AGCAGGTTTTACATGGACAT     |
| TRADD   | TGGAGGCACTCGAGGAGAACGA  | AGGAACCCTAAGGCCATCCA     |
| P53     | AAGGGCCTGACTCAGACTGAC   | GAAGTCCTGGGTGCTTCTGAC    |
| BIM     | GTGTGGAGAATGCATTGACAG   | CTGAAACGTCACCTGCCCCCT    |
| BAX     | TCTGAGCAGATCATGAAGACA   | ACACTCGCTCAGCTTCTTGGTG   |
| BAK1    | AGATGGTCACCTTACCTCTGCA  | TTCTCTGCCGTGGGCTGCAGGT   |
| NCOR1   | GGGTCTTAAGCTATTCTGAGT   | AGGCTGAGGATGAGAAGGGGTT   |
| β-Actin | CAGGTCATCACCATTGGCAAT   | GTCTTTGCCGATGTCCACGTC    |

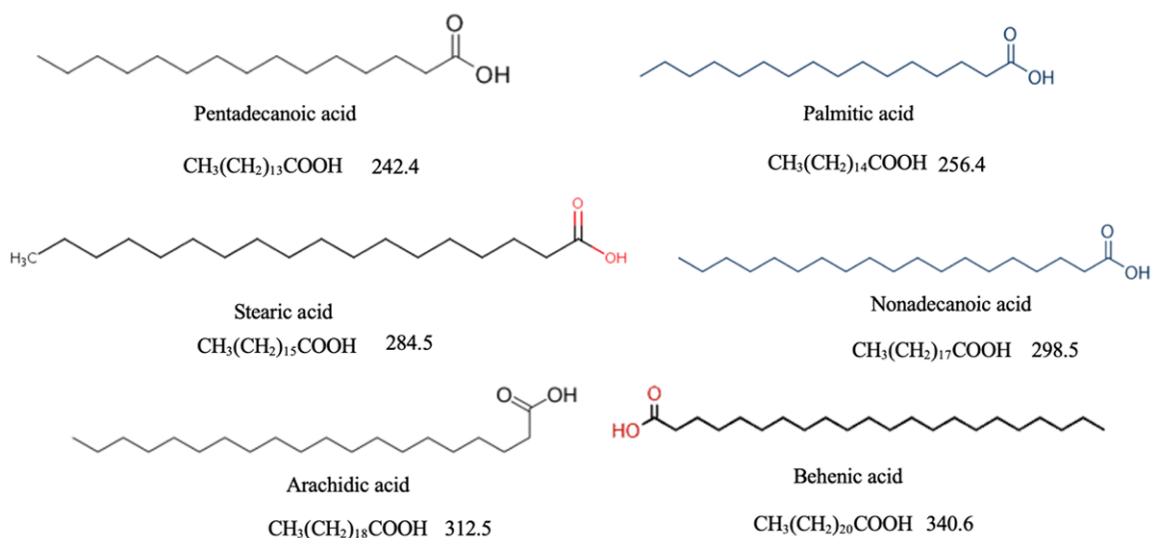

**Supplementary Figure 1.** The chemical structures of LCFAs identified by GC-MS. The chemical structures of six LCFAs (PDA, stearic acid, palmitic acid, nonadecanoic acid, arachidic acid and behenic acid) as shown in **Figure 1** and their molecular weights.

## The pathological role of PDA

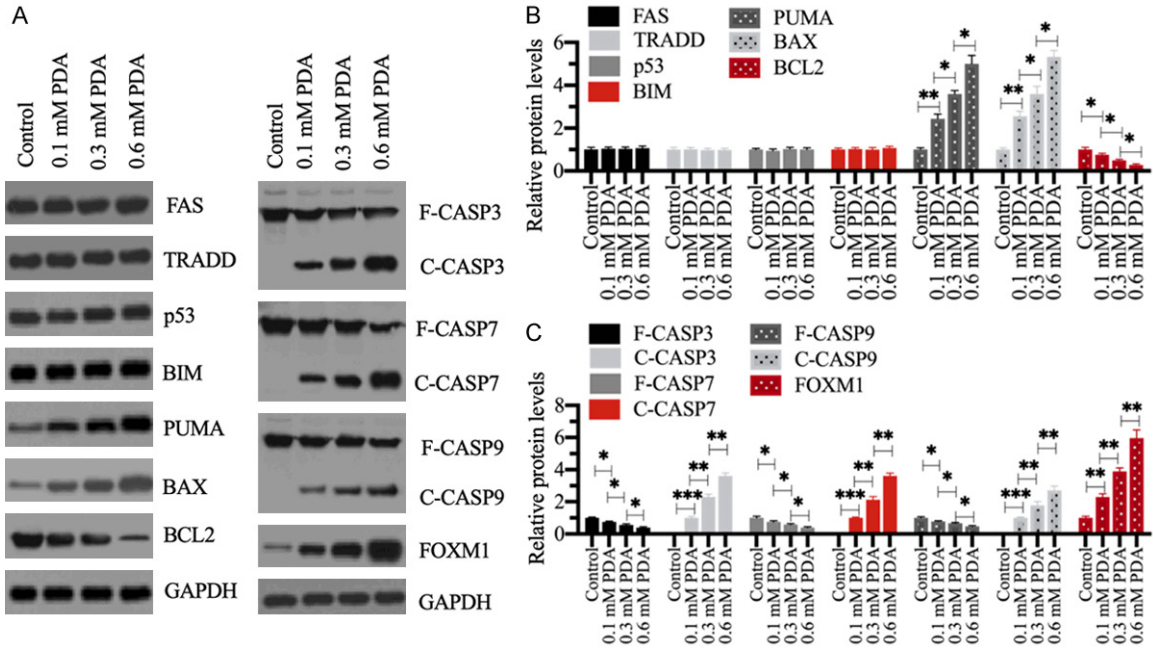

**Supplementary Figure 2.** The protein levels of genes involved in apoptotic signaling in PDA-treated cells. A. Immunoblot results. Total cell extracts from cells treated with different doses of PDA (0, 0.1, 0.3 and 0.6 mM) were subjected to western blotting to examine the protein levels of FAS, TRADD, p53, BIM, PUMA, BAX, BCL2, CASP3, CASP7, CASP9, and FOXM1. F: full length; C: cleaved form. B and C. Quantification of protein band signals. The protein band signals in A were quantified using Image J software. Statistical significance is denoted by \* for  $P < 0.05$ , \*\* for  $P < 0.01$ , and \*\*\* for  $P < 0.001$ .

The pathological role of PDA

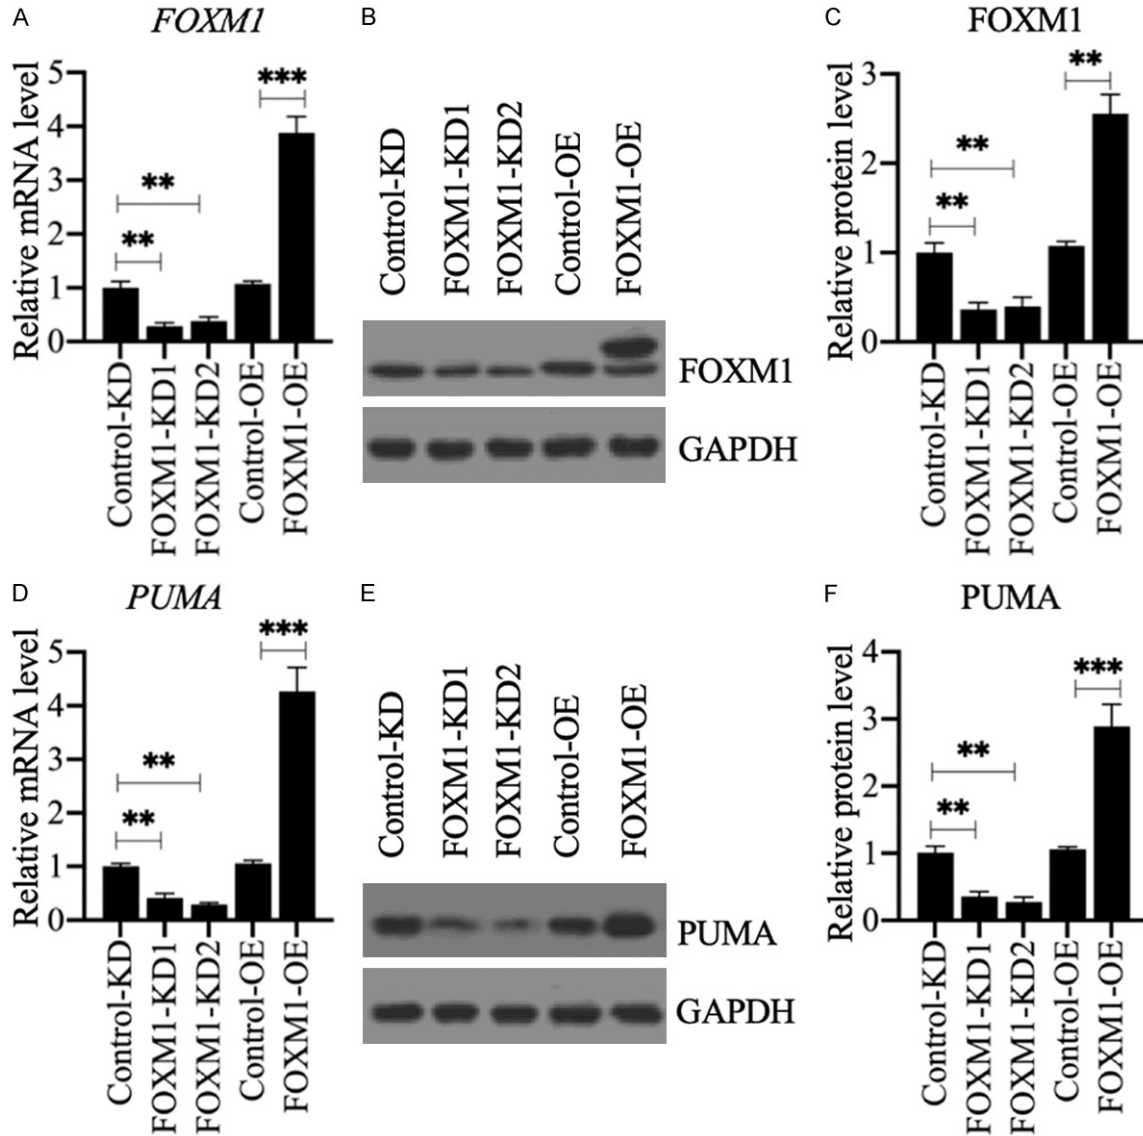

**Supplementary Figure 3.** The effects of *FOXM1* knockdown and overexpression on *PUMA* expression. (A) The relative mRNA level of *FOXM1*. Total RNA from Control-KD, FOXM1-KD1, FOXM1-KD2, Control-OE, and FOXM1-OE1 cells was applied to RT-qPCR analysis to examine the *FOXM1* mRNA level. \*\* $P < 0.01$  and \*\*\* $P < 0.001$ . (B and C) The protein level of *FOXM1*. Total cell extracts from cells used in (A) were applied to western blotting to examine the protein levels of *FOXM1* and GAPDH (loading control) (B). The *FOXM1* protein signals were quantified using ImageJ software and normalized to their corresponding GAPDH levels (C). \*\* $P < 0.01$ . (D) The relative *PUMA* mRNA level. The same RNA samples as used in (A) were subjected to RT-qPCR analysis to examine the expression of *PUMA*. \*\* $P < 0.01$  and \*\*\* $P < 0.001$ . (E and F) *PUMA* protein levels. The same cell extracts as used in (B) were applied to western blotting to examine the protein levels of *PUMA* and GAPDH (loading control) (E). The *PUMA* protein signals were quantified using ImageJ software and normalized to their corresponding GAPDH levels (F). \*\* $P < 0.01$  and \*\*\* $P < 0.001$ .

**Supplementary Table 2.** The *FOXM1*-associated proteins by LC-MS/MS analysis

| Protein | Protein description                          | Percolator score | Molecular weight |
|---------|----------------------------------------------|------------------|------------------|
| FOXM1   | Forkhead Box M1                              | 7436             | 84283            |
| NPM1    | Nucleophosmin 1                              | 65543            | 32575            |
| NRIP2   | Nuclear Receptor Interacting Protein 2       | 5231             | 31331            |
| KIF2A   | Kinesin Family Member 2A                     | 5012             | 79955            |
| HSPA4   | Heat Shock Protein Family A (Hsp70) Member 4 | 4657             | 94331            |

## The pathological role of PDA

|         |                                                         |      |        |
|---------|---------------------------------------------------------|------|--------|
| UHRF1   | Ubiquitin Like With PHD And Ring Finger Domains 1       | 4332 | 89814  |
| IFI27   | Interferon Alpha Inducible Protein 27                   | 3678 | 11542  |
| RRM1    | Ribonucleotide Reductase Catalytic Subunit M1           | 3212 | 90070  |
| PPP2CA  | Protein Phosphatase 2 Catalytic Subunit Alpha           | 3094 | 35594  |
| PCLAF   | PCNA Clamp Associated Factor                            | 2778 | 11986  |
| RPA2    | Replication Protein A2                                  | 2543 | 29247  |
| SPC25   | SPC25 Component Of NDC80 Kinetochore Complex            | 2123 | 26153  |
| SMC4    | Structural Maintenance Of Chromosomes 4                 | 2094 | 147182 |
| NSCAN12 | Zinc Finger And SCAN Domain Containing 12               | 1965 | 70222  |
| DMAP1   | DNA Methyltransferase 1 Associated Protein 1            | 1932 | 52993  |
| MKS1    | MKS Transition Zone Complex Subunit 1                   | 1902 | 64528  |
| CALM2   | Calmodulin 2                                            | 1854 | 16838  |
| PIGL    | Phosphatidylinositol Glycan Anchor Biosynthesis Class L | 1823 | 28531  |
| NCOR1   | Nuclear Receptor Corepressor 1                          | 1793 | 270210 |
| NR1D2   | Nuclear Receptor Subfamily 1 Group D Member 2           | 1744 | 64625  |
| SIAH2   | Siah E3 Ubiquitin Protein Ligase 2                      | 1732 | 34615  |
| TBL1X   | Transducin Beta Like 1 X-Linked                         | 1657 | 62496  |
| MECP2   | Methyl-CpG Binding Protein 2                            | 1432 | 52441  |
| PRMT1   | Protein Arginine Methyltransferase 1                    | 1335 | 42462  |
| BAZ1A   | Bromodomain Adjacent To Zinc Finger Domain 1A           | 1207 | 178702 |
| PLD6    | Phospholipase D Family Member 6                         | 1184 | 28273  |
| BAZ2A   | Bromodomain Adjacent To Zinc Finger Domain 2A           | 1034 | 211198 |
| TEKT3   | Tektin 3                                                | 1021 | 56636  |
| PBRM1   | Polybromo 1                                             | 968  | 192948 |
| DDX20   | DEAD-Box Helicase 20                                    | 903  | 92241  |
| MED19   | Mediator Complex Subunit 19                             | 887  | 26273  |
| ERBB2   | Erb-B2 Receptor Tyrosine Kinase 2                       | 834  | 137910 |
| DDX46   | DEAD-Box Helicase 46                                    | 812  | 117362 |
| EWSR1   | EWS RNA Binding Protein 1                               | 789  | 68478  |
| RPS11   | Ribosomal Protein S11                                   | 764  | 18431  |
| MED9    | Mediator Complex Subunit 9                              | 692  | 16403  |
| POLR1C  | RNA Polymerase I And III Subunit C                      | 632  | 39250  |
| DVL2    | Dishevelled Segment Polarity Protein 2                  | 587  | 78948  |
| DAP3    | Death Associated Protein 3                              | 532  | 45566  |
| TAF9    | TATA-Box Binding Protein Associated Factor 9            | 511  | 28974  |
| CORO2A  | Coronin 2A                                              | 489  | 59763  |
| CDRT4   | CMT1A Duplicated Region Transcript 4                    | 463  | 17643  |
| NR2C1   | Nuclear Receptor Subfamily 2 Group C Member 1           | 411  | 67315  |
| DUS3L   | Dihydrouridine Synthase 3 Like                          | 406  | 72594  |
| MTMR3   | Myotubularin Related Protein 3                          | 394  | 133619 |
| XPO5    | Exportin 5                                              | 365  | 136311 |
| NUP160  | Nucleoporin 160                                         | 342  | 162121 |
| FLNA    | Filamin A                                               | 322  | 280739 |
| H2BC5   | H2B Clustered Histone 5                                 | 312  | 13936  |
| UPF1    | UPF1 RNA Helicase And ATPase                            | 287  | 124345 |
| SMYD3   | SET And MYND Domain Containing 3                        | 265  | 49097  |
| SND1    | Staphylococcal Nuclease And Tudor Domain Containing 1   | 243  | 101997 |
| MYL6    | Myosin Light Chain 6                                    | 225  | 16930  |
| SCAP    | SREBF Chaperone                                         | 212  | 139729 |

## The pathological role of PDA

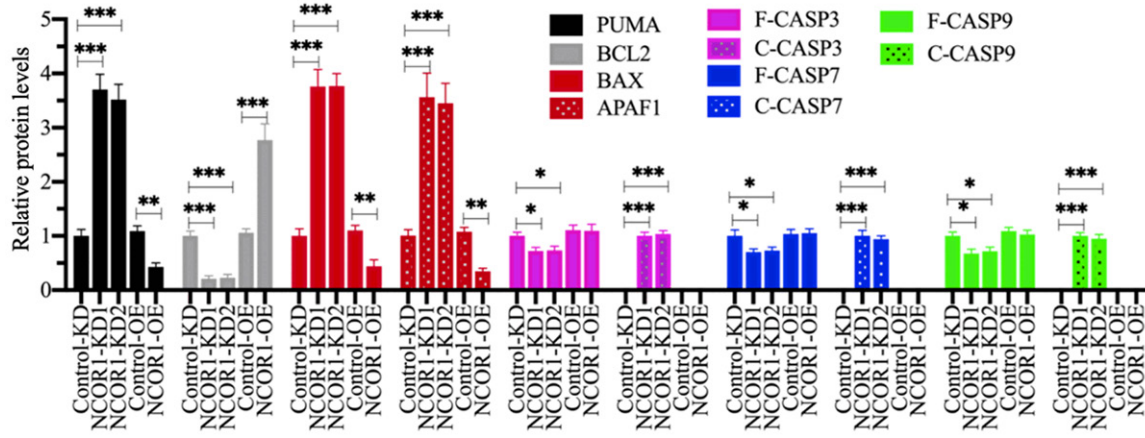

**Supplementary Figure 4.** The relative protein levels of apoptotic proteins in NCOR1-KD cells. The protein signals shown in **Figure 7F** were quantified using ImageJ software and normalized to their corresponding GAPDH level. \* $P < 0.05$ , \*\* $P < 0.01$  and \*\*\* $P < 0.001$ .

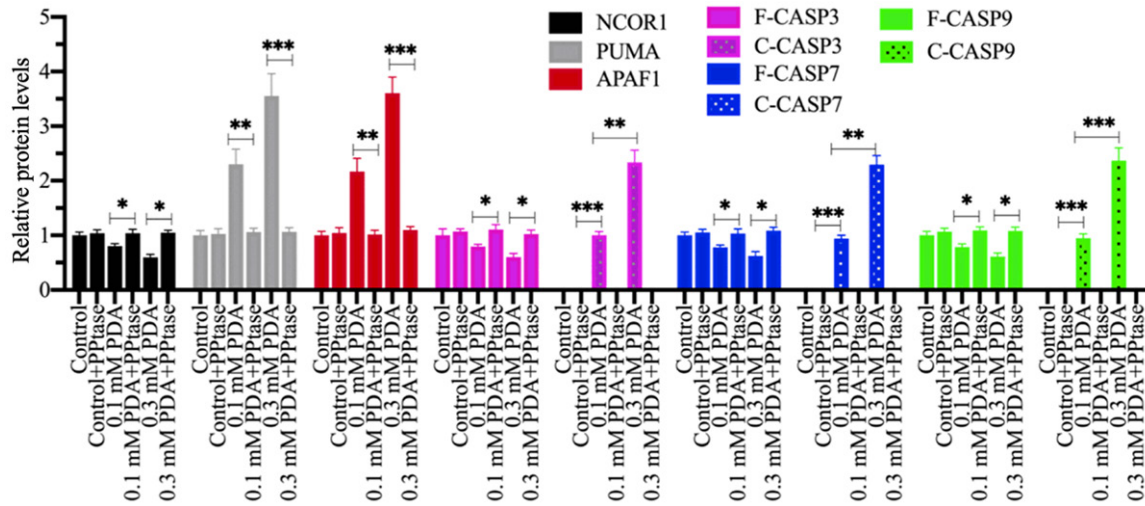

**Supplementary Figure 5.** The relative protein levels of apoptotic proteins in cells treated with or without PDA and PPtase. The protein signals shown in **Figure 8D** were quantified using ImageJ software and normalized to their corresponding GAPDH level. \* $P < 0.05$ , \*\* $P < 0.01$  and \*\*\* $P < 0.001$ .

## The pathological role of PDA

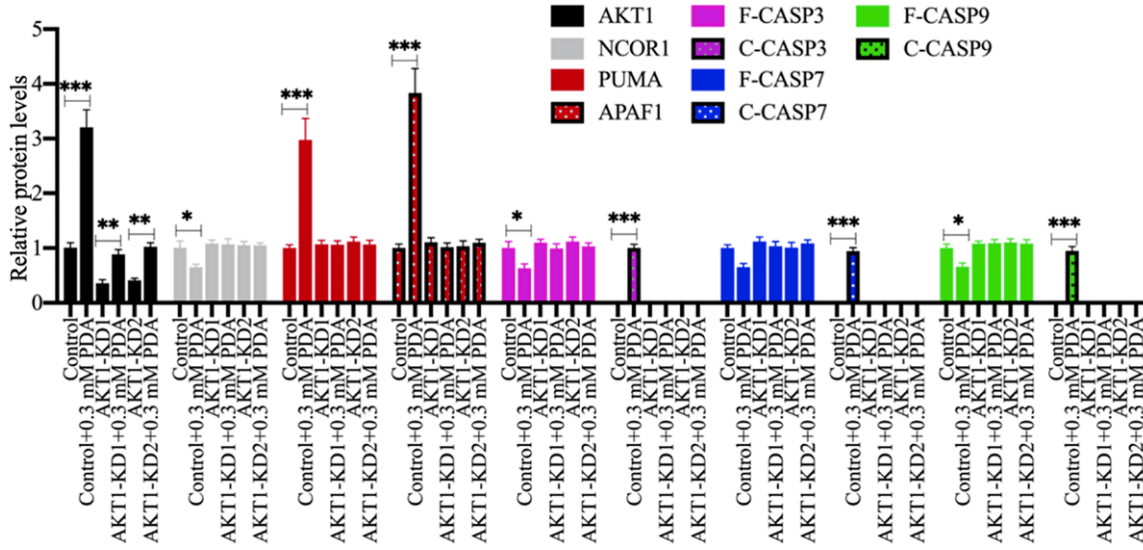

**Supplementary Figure 6.** The relative protein levels of apoptotic proteins in AKT-KD cells treated with or without PDA. The protein signals shown in **Figure 8F** were quantified using ImageJ software and normalized to their corresponding GAPDH level. \* $P < 0.05$ , \*\* $P < 0.01$  and \*\*\* $P < 0.001$ .

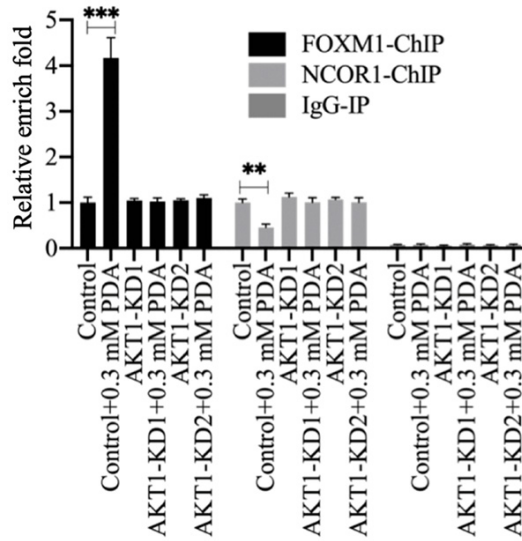

**Supplementary Figure 7.** The occupancies of NCOR1 and FOXM1 on the promoter of *PUMA*. Cells used in **Figure 8F** were subjected to ChIP assays using anti-NCOR1, anti-FOXM1 and IgG (negative control). The purified input and output DNA samples were subjected to RT-qPCR analysis to examine the occupancy of NCOR1 and FOXM1 on the promoter of *PUMA*. \*\* $P < 0.01$  and \*\*\* $P < 0.001$ .
